# Supplementary material for: Measurement experiences with FluxSet digital D/I station
Source: Copernicus journal article supplement (doi:10.5194/gi-6-279-2017), 2017-07-25
Supplement: Supplementary file [file gi-6-279-2017-supplement-title-page.pdf › gi-6-279-2017-supplement-title-page.pdf]

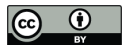

## *Supplement of*

# **Measurement experiences with FluxSet digital D/I station**

**László Hegymegi et al.**

*Correspondence to:* László Hegymegi ([hegymegi@mingeo.com](mailto:hegymegi@mingeo.com))

- [gi-6-279-2017-supplement-title-page.pdf](#)
- [publicData.txt](#)
- [raw20161219.nck](#)

The copyright of individual parts of the supplement might differ from the CC BY 3.0 License.
